# Supplementary material
Source: publisher site journal article supplement (https://www.dovepress.com/article/377249)
Supplement: Supplementary file 1 [file get_supplementary_file.php]

**Supplementary Table 1** Measures Undertaken to Ensure Study Rigour and Trustworthiness15, 28

| - The clarity and the feasibility of the interview was assessed in a pilot interview, not included in the data analysis. No changes were requested. - Biases in interpretation were prevented by bracketing the researchers’ preconceptions and by analysing anonymised data. - Data triangulation was ensured by three researchers, the first two (AP, SC) performing the data analysist and the third supervised the entire process (MP). In each step, meetings were performed to ensure rigour in the analysis. - Data dependability were ensured by numbering the interviews and by extracting the quotes to support each specific intervention identified. - Finding’s credibility was ensured by providing direct quotes indicating the source interviews (eg, NH 5). - Data saturation was ensured by involving an additional NH. - Transcripts were not returned to participants for comment and/or correction to limit their burden during the fourth wave. |
| --- |

**Abbreviations:** NH, Nursing Home.
